# Supplementary material for: Physical controls and ENSO event influence on weathering in the Panama Canal Watershed
Source: PubMed Central journal article supplement (PMC7331659; doi:10.1038/s41598-020-67797-7), 2020-07-02
Supplement: 41598_2020_67797_MOESM1_ESM.pdf [file 41598_2020_67797_MOESM1_ESM.pdf]

# **Physical controls and ENSO event influence on weathering in the Panama**

## **Canal Watershed**

Devin F. Smith, Steven T. Goldsmith, Brendan A. Harmon,

Jorge A. Espinosa, and Russell S. Harmon

## **Supplementary Information**

**Table S1:** Annual and long-term cation (Ca+Mg+Na+K) yields (in t/km<sup>2</sup>/yr) for the PCW watersheds (1998-2015)

| Watershed                  | Area upstream of sampling location (km <sup>2</sup> ) | 1998 | 1999 | 2000 | 2001 | 2002 | 2003 | 2004 | 2005 | 2006 | 2007 | 2008 | 2009 | 2010 | 2011 | 2012 | 2013 | 2014 | 2015 | Long-term average | std. dev. | CV   |
|----------------------------|-------------------------------------------------------|------|------|------|------|------|------|------|------|------|------|------|------|------|------|------|------|------|------|-------------------|-----------|------|
| <i>North side of canal</i> |                                                       |      |      |      |      |      |      |      |      |      |      |      |      |      |      |      |      |      |      |                   |           |      |
| Gatun                      | 115                                                   | 11.6 | 18.8 | 13.3 | 9.14 | 9.41 | 11.7 | 12.9 | 8.41 | 11.8 | 14.3 | 10.4 | 12.6 | 21.4 | 16.6 | 12.7 | 8.74 | 9.22 | 5.81 | 12.2              | 3.74      | 30.8 |
| Boqueron                   | 91.1                                                  | 4.29 | 7.18 | 5.65 | 4.49 | 5.03 | 4.41 | 6.75 | 4.34 | 5.34 | 6.06 | 4.43 | 6.80 | 8.03 | 6.03 | 6.20 | 4.88 | 4.24 | 4.11 | 5.46              | 1.15      | 21.1 |
| Pequini                    | 145                                                   | 16.9 | 24.8 | 19.6 | 16.3 | 19.6 | 16.3 | 20.6 | 14.8 | 21.7 | 22.9 | 16.3 | 21.7 | 26.0 | 22.0 | 21.3 | 15.7 | 15.2 | 15.4 | 19.3              | 3.42      | 17.7 |
| Chagres                    | 407                                                   | 8.42 | 13.6 | 12.0 | 7.82 | 9.34 | 8.47 | 11.9 | 8.39 | 12.4 | 12.7 | 9.93 | 12.2 | 13.9 | 13.6 | 12.9 | 9.72 | 8.16 | 8.20 | 10.8              | 2.16      | 20.1 |
| Indio Este                 | 80.3                                                  |      |      |      |      |      |      |      |      |      |      | 7.57 | 7.25 | 9.75 | 10.6 | 8.42 | 6.31 | 4.03 | 3.55 | 7.18              | 2.33      | 32.5 |
| <i>South side of canal</i> |                                                       |      |      |      |      |      |      |      |      |      |      |      |      |      |      |      |      |      |      |                   |           |      |
| Ciri Grande                | 198                                                   | 1.88 | 3.85 | 2.70 | 2.30 | 3.31 | 3.49 | 2.37 | 2.20 | 3.35 | 3.59 | 2.55 | 2.30 | 3.65 | 3.57 | 3.91 | 2.31 | 2.18 | 1.74 | 2.85              | 0.71      | 24.9 |
| Trinidad                   | 169                                                   | 3.00 | 5.62 | 4.25 | 2.96 | 4.77 | 5.81 | 4.05 | 3.66 | 5.30 | 5.48 | 3.93 | 4.10 | 5.75 | 5.71 | 6.57 | 3.69 | 3.08 | 2.37 | 4.45              | 1.18      | 26.6 |
| Cano Quebrado              | 71.2                                                  |      |      |      |      |      |      |      | 2.54 | 3.10 | 4.88 | 2.53 | 2.63 | 3.61 | 4.01 | 3.64 | 3.61 | 2.34 | 1.58 | 3.13              | 0.88      | 28.2 |
| Basin Wide Average         |                                                       | 7.68 | 12.3 | 9.59 | 7.16 | 8.58 | 8.36 | 9.77 | 6.34 | 9.00 | 9.98 | 7.20 | 8.69 | 11.5 | 10.3 | 9.45 | 6.87 | 6.05 | 5.35 | 8.16              | 1.95      | 25.2 |

**Table S2:** Annual and long-term suspended sediment yields (in t/km<sup>2</sup>/yr) for the PCW watersheds (2005-1015)

| Watershed                  | Area<br>upstream of<br>sampling<br>location<br>(km <sup>2</sup> ) | 2005 | 2006 | 2007 | 2008 | 2009 | 2010 | 2011 | 2012 | 2013 | 2014 | 2015 | Long-<br>term<br>average | std. dev. | CV   |
|----------------------------|-------------------------------------------------------------------|------|------|------|------|------|------|------|------|------|------|------|--------------------------|-----------|------|
| <i>North side of canal</i> |                                                                   |      |      |      |      |      |      |      |      |      |      |      |                          |           |      |
| Gatun                      | 115                                                               | 99.0 | 399  | 645  | 300  | 422  | 3626 | 1051 | 617  | 229  | 294  | 181  | 715                      | 955       | 134  |
| Boqueron                   | 91.1                                                              | 209  | 584  | 865  | 299  | 1049 | 6680 | 1638 | 1958 | 567  | 865  | 1600 | 1483                     | 1729      | 117  |
| Pequini                    | 145                                                               | 53.9 | 110  | 1226 | 502  | 1008 | 6705 | 1818 | 1804 | 896  | 692  | 1613 | 1494                     | 1749      | 117  |
| Chagres                    | 407                                                               | 77.9 | 672  | 1663 | 233  | 575  | 6346 | 1920 | 1811 | 666  | 455  | 1120 | 1413                     | 1673      | 118  |
| Indio Este                 | 80.3                                                              |      |      |      |      |      |      |      |      |      |      |      |                          |           |      |
| <i>South side of canal</i> |                                                                   |      |      |      |      |      |      |      |      |      |      |      |                          |           |      |
| Ciri Grande                | 198                                                               | 61.3 | 400  | 286  | 120  | 102  | 448  | 323  | 672  | 145  | 130  | 91.5 | 253                      | 184       | 72.7 |
| Trinidad                   | 169                                                               | 94.9 | 331  | 277  | 174  | 185  | 433  | 321  | 539  | 191  | 127  | 83.0 | 251                      | 138       | 55.1 |
| Cano Quebrado              | 71.2                                                              | 84.6 | 130  | 239  | 67.4 | 110  | 145  | 151  | 161  | 161  | 69.4 | 38.8 | 124                      | 54        | 43.9 |
| Basin Wide Average         |                                                                   | 97.2 | 375  | 743  | 242  | 493  | 3483 | 1032 | 1080 | 408  | 376  | 675  | 819                      | 926       | 93.9 |

**Table S3:** Pearson correlation coefficients for cation flux analysis (individual)

| Parameter               | <i>North side of canal</i> |             |                  |          |             |                  |               |             |                  |         |              |                  |            |             |              |
|-------------------------|----------------------------|-------------|------------------|----------|-------------|------------------|---------------|-------------|------------------|---------|--------------|------------------|------------|-------------|--------------|
|                         | Gatun                      |             |                  | Boqueron |             |                  | Pequini       |             |                  | Chagres |              |                  | Indio Este |             |              |
|                         | n =                        | <i>r</i>    | <i>p</i>         | n =      | <i>r</i>    | <i>p</i>         | n =           | <i>r</i>    | <i>p</i>         | n =     | <i>r</i>     | <i>p</i>         | n =        | <i>r</i>    | <i>p</i>     |
| Mean annual rainfall    | 18                         | <b>0.9</b>  | <b>&lt;0.001</b> | 18       | <b>0.74</b> | <b>&lt;0.001</b> | 18            | <b>0.78</b> | <b>&lt;0.001</b> | 18      | <b>0.76</b>  | <b>&lt;0.001</b> | 8          | <b>0.91</b> | <b>0.002</b> |
| Mean annual temperature | 18                         | -0.42       | 0.08             | 18       | -0.46       | 0.06             | 18            | -0.43       | 0.08             | 18      | <i>-0.48</i> | <i>0.05</i>      | 8          | -0.33       | 0.22         |
| SS flux                 | 11                         | <b>0.91</b> | <b>&lt;0.001</b> | 11       | <i>0.69</i> | <i>0.02</i>      | 11            | 0.48        | 0.040            | 11      | <i>0.69</i>  | <i>0.02</i>      | n.d.       | n.d.        | n.d.         |
| Parameter               | <i>South side of canal</i> |             |                  |          |             |                  |               |             |                  |         |              |                  |            |             |              |
|                         | Ciri Grande                |             |                  | Trinidad |             |                  | Cano Quebrado |             |                  |         |              |                  |            |             |              |
|                         | n =                        | <i>r</i>    | <i>p</i>         | n =      | <i>r</i>    | <i>p</i>         | n =           | <i>r</i>    | <i>p</i>         |         |              |                  |            |             |              |
| Mean annual rainfall    | 18                         | <b>0.68</b> | <b>0.002</b>     | 18       | <b>0.77</b> | <b>&lt;0.001</b> | 11            | <b>0.83</b> | <b>0.002</b>     |         |              |                  |            |             |              |
| Mean annual temperature | 18                         | -0.37       | 0.14             | 18       | -0.35       | 0.15             | 11            | -0.28       | 0.31             |         |              |                  |            |             |              |
| SS flux                 | 11                         | <b>0.91</b> | <b>&lt;0.001</b> | 11       | <b>0.9</b>  | <b>&lt;0.001</b> | 11            | <b>0.97</b> | <b>&lt;0.001</b> |         |              |                  |            |             |              |

Note: *r* is Pearson correlation coefficient. Values in bold indicate statistical significance level of 99%. Values in italic indicate statistical significance of 95%

n.d. = no data

**Table S4:** Pearson correlation coefficients for suspended sediment flux analysis (individual)

| Parameter               | <i>North side of canal</i> |             |                  |          |            |                  |               |             |                  |         |          |          |
|-------------------------|----------------------------|-------------|------------------|----------|------------|------------------|---------------|-------------|------------------|---------|----------|----------|
|                         | Gatun                      |             |                  | Boqueron |            |                  | Pequini       |             |                  | Chagres |          |          |
|                         | n =                        | <i>r</i>    | <i>p</i>         | n =      | <i>r</i>   | <i>p</i>         | n =           | <i>r</i>    | <i>p</i>         | n =     | <i>r</i> | <i>p</i> |
| Mean annual rainfall    | 11                         | 0.66        | 0.03             | 11       | 0.2        | 0.46             | 11            | 0.09        | 0.77             | 11      | 0.36     | 0.28     |
| Mean annual temperature | 11                         | -0.42       | 0.08             | 11       | -0.5       | 0.06             | 11            | -0.29       | 0.24             | 11      | -0.48    | 0.05     |
| Cation flux             | 11                         | <b>0.91</b> | <b>&lt;0.001</b> | 11       | 0.69       | 0.02             | 11            | 0.48        | 0.040            | 11      | 0.69     | 0.02     |
| Parameter               | <i>South side of canal</i> |             |                  |          |            |                  |               |             |                  |         |          |          |
|                         | Ciri Grande                |             |                  | Trinidad |            |                  | Cano Quebrado |             |                  |         |          |          |
|                         | n =                        | <i>r</i>    | <i>p</i>         | n =      | <i>r</i>   | <i>p</i>         | n =           | <i>r</i>    | <i>p</i>         |         |          |          |
| Mean annual rainfall    | 11                         | 0.59        | 0.06             | 11       | 0.73       | 0.01             | 11            | 0.83        | 0.002            |         |          |          |
| Mean annual temperature | 11                         | -0.37       | 0.14             | 11       | -0.35      | 0.15             | 11            | -0.28       | 0.31             |         |          |          |
| Cation flux             | 11                         | <b>0.91</b> | <b>&lt;0.001</b> | 11       | <b>0.9</b> | <b>&lt;0.001</b> | 11            | <b>0.97</b> | <b>&lt;0.001</b> |         |          |          |

Note: *r* is Pearson correlation coefficient. Values in bold indicate statistical significance level of 99%. Values in italic indicate statistical significance of 95%

**Table S5:** Pearson correlation coefficients for cation flux analysis (collective)

| Time Period | n | Tree cover |          | Mosaic cover |          | Sediment flux |          | Mean elevation |          | Mean slope |          | Minimum slope |          |
|-------------|---|------------|----------|--------------|----------|---------------|----------|----------------|----------|------------|----------|---------------|----------|
|             |   | <i>r</i>   | <i>p</i> | <i>r</i>     | <i>p</i> | <i>r</i>      | <i>p</i> | <i>r</i>       | <i>p</i> | <i>r</i>   | <i>p</i> | <i>r</i>      | <i>p</i> |
| 1998        | 6 | 0.74       | 0.10     | -0.72        | 0.11     |               |          | 0.14           | 0.78     | 0.38       | 0.46     | 0.38          | 0.46     |
| 1999        | 6 | 0.69       | 0.13     | -0.68        | 0.14     |               |          | 0.14           | 0.79     | 0.35       | 0.49     | 0.35          | 0.49     |
| 2000        | 6 | 0.73       | 0.10     | -0.69        | 0.13     |               |          | 0.22           | 0.68     | 0.44       | 0.39     | 0.44          | 0.39     |
| 2001        | 6 | 0.74       | 0.09     | -0.75        | 0.09     |               |          | 0.13           | 0.81     | 0.35       | 0.50     | 0.35          | 0.50     |
| 2002        | 6 | 0.66       | 0.15     | -0.74        | 0.09     |               |          | 0.11           | 0.83     | 0.30       | 0.56     | 0.30          | 0.56     |
| 2003        | 6 | 0.47       | 0.35     | -0.54        | 0.26     |               |          | 0.06           | 0.91     | 0.21       | 0.68     | 0.21          | 0.68     |
| 2004        | 6 | 0.76       | 0.08     | -0.74        | 0.09     |               |          | 0.20           | 0.71     | 0.47       | 0.34     | 0.47          | 0.34     |
| 2005        | 7 | 0.56       | 0.19     | -0.79        | 0.03     | -0.19         | 0.68     | 0.47           | 0.34     | 0.50       | 0.31     | 0.50          | 0.31     |
| 2006        | 7 | 0.61       | 0.15     | -0.84        | 0.02     | -0.09         | 0.85     | 0.36           | 0.43     | 0.36       | 0.40     | 0.55          | 0.20     |
| 2007        | 7 | 0.47       | 0.29     | -0.78        | 0.04     | 0.79          | 0.04     | 0.37           | 0.47     | 0.39       | 0.44     | 0.39          | 0.44     |
| 2008        | 8 | 0.64       | 0.09     | -0.81        | 0.01     | 0.81          | 0.03     | 0.52           | 0.29     | 0.55       | 0.26     | 0.55          | 0.26     |
| 2009        | 8 | 0.65       | 0.08     | -0.80        | 0.02     | 0.86          | 0.01     | 0.47           | 0.35     | 0.54       | 0.26     | 0.54          | 0.26     |
| 2010        | 8 | 0.65       | 0.08     | -0.72        | 0.04     | 0.84          | 0.02     | 0.46           | 0.35     | 0.54       | 0.26     | 0.54          | 0.26     |
| 2011        | 8 | 0.60       | 0.12     | -0.72        | 0.04     | 0.78          | 0.04     | 0.47           | 0.34     | 0.50       | 0.31     | 0.50          | 0.31     |
| 2012        | 8 | 0.65       | 0.08     | -0.74        | 0.04     | 0.64          | 0.12     | 0.50           | 0.31     | 0.57       | 0.24     | 0.57          | 0.24     |
| 2013        | 8 | 0.49       | 0.22     | -0.77        | 0.03     | 0.81          | 0.03     | 0.35           | 0.50     | 0.38       | 0.45     | 0.38          | 0.45     |
| 2014        | 8 | 0.55       | 0.16     | -0.72        | 0.05     | 0.74          | 0.06     | 0.37           | 0.47     | 0.47       | 0.35     | 0.47          | 0.35     |
| 2015        | 8 | 0.61       | 0.10     | -0.83        | 0.01     | 0.83          | 0.02     | 0.45           | 0.37     | 0.54       | 0.27     | 0.54          | 0.27     |
| LTA         | 8 | 0.63       | 0.14     | -0.74        | 0.07     | 0.62          | 0.17     | 0.32           | 0.54     | 0.44       | 0.39     | 0.45          | 0.38     |

Note: *r* is Pearson correlation coefficient. Values in bold indicate statistical significance level of 99%. Values in italics indicate statistical significance of 95%

**Table S6: Pearson correlation coefficients for suspended sediment flux analysis (collective)**

| Time Period | n | Tree cover  |             | Mosaic cover |                  | Cation flux |             | Mean elevation |          | Mean slope |          |
|-------------|---|-------------|-------------|--------------|------------------|-------------|-------------|----------------|----------|------------|----------|
|             |   | <i>r</i>    | <i>p</i>    | <i>r</i>     | <i>p</i>         | <i>r</i>    | <i>p</i>    | <i>r</i>       | <i>p</i> | <i>r</i>   | <i>p</i> |
| 2005        | 7 | 0.07        | 0.88        | 0.11         | 0.64             | -0.19       | 0.68        | 0.00           | 1.00     | 0.20       | 0.66     |
| 2006        | 7 | 0.53        | 0.22        | -0.11        | 0.81             | 0.38        | 0.47        | 0.76           | 0.05     | 0.67       | 0.10     |
| 2007        | 7 | 0.66        | 0.11        | <b>-0.97</b> | <b>&lt;0.001</b> | <i>0.79</i> | <i>0.04</i> | 0.69           | 0.08     | 0.62       | 0.14     |
| 2008        | 7 | <i>0.85</i> | <i>0.02</i> | -0.77        | <i>0.03</i>      | <i>0.81</i> | <i>0.03</i> | 0.34           | 0.45     | 0.55       | 0.20     |
| 2009        | 7 | 0.70        | 0.08        | <b>-0.92</b> | <b>0.004</b>     | <i>0.86</i> | <i>0.01</i> | 0.33           | 0.47     | 0.52       | 0.23     |
| 2010        | 7 | <i>0.84</i> | <i>0.02</i> | <b>-0.93</b> | <b>0.003</b>     | <i>0.84</i> | <i>0.02</i> | 0.55           | 0.20     | 0.64       | 0.12     |
| 2011        | 7 | <i>0.84</i> | <i>0.02</i> | <b>-0.95</b> | <b>0.001</b>     | <i>0.78</i> | <i>0.04</i> | 0.63           | 0.13     | 0.70       | 0.09     |
| 2012        | 7 | <b>0.90</b> | <b>0.01</b> | <b>-0.91</b> | <b>0.005</b>     | 0.64        | 0.12        | 0.62           | 0.14     | 0.64       | 0.90     |
| 2013        | 7 | 0.59        | 0.16        | <b>-0.97</b> | <b>&lt;0.001</b> | <i>0.81</i> | <i>0.03</i> | 0.44           | 0.32     | 0.50       | 0.25     |
| 2014        | 7 | <i>0.76</i> | <i>0.05</i> | <b>-0.94</b> | <b>0.002</b>     | 0.74        | 0.06        | 0.36           | 0.42     | 0.55       | 0.20     |
| 2015        | 7 | 0.71        | 0.07        | <b>-0.99</b> | <b>&lt;0.001</b> | <i>0.83</i> | <i>0.02</i> | 0.40           | 0.38     | 0.51       | 0.24     |
| LTA         | 7 | <i>0.81</i> | <i>0.03</i> | <b>-0.95</b> | <b>0.001</b>     | <i>0.80</i> | <i>0.03</i> | 0.57           | 0.18     | 0.65       | 0.12     |

Note: *r* is Pearson correlation coefficient. Values in bold indicate statistical significance level of 99%. Values in italics indicate statistical significance of 95%

**Table S7:** Total area (in km<sup>2</sup> and %) of land use/landcover (LU/LC) categories above each sampling location (1998-2015)

| River         | Area upstream of sampling location (km <sup>2</sup> ) | Total area (in km <sup>2</sup> ) |        |       |        |         |         |      |       | Total area (in %) |        |       |        |         |         |      |       |
|---------------|-------------------------------------------------------|----------------------------------|--------|-------|--------|---------|---------|------|-------|-------------------|--------|-------|--------|---------|---------|------|-------|
|               |                                                       | 1998                             |        |       |        |         |         |      |       | 1998              |        |       |        |         |         |      |       |
|               |                                                       | Crops                            | Mosaic | Trees | Shrubs | Grasses | Flooded | Bare | Total | Crops             | Mosaic | Trees | Shrubs | Grasses | Flooded | Bare | Total |
| Gatun         | 115                                                   | 0.00                             | 24.5   | 90.2  | 0.00   | 0.00    | 0.00    | 0.00 | 115   | 0.00              | 21.4   | 78.6  | 0.00   | 0.00    | 0.00    | 0.00 | 100   |
| Boqueron      | 92.1                                                  | 0.00                             | 6.89   | 85.2  | 0.00   | 0.00    | 0.05    | 0.00 | 92.1  | 0.00              | 7.47   | 92.5  | 0.00   | 0.00    | 0.06    | 0.00 | 100   |
| Pequini       | 144                                                   | 0.00                             | 0.00   | 144   | 0.00   | 0.00    | 0.00    | 0.00 | 144   | 0.00              | 0.00   | 100   | 0.00   | 0.00    | 0.00    | 0.00 | 100   |
| Chagres       | 407                                                   | 0.00                             | 0.81   | 406   | 0.00   | 0.00    | 0.36    | 0.17 | 407   | 0.00              | 0.20   | 99.7  | 0.00   | 0.00    | 0.09    | 0.04 | 100   |
| Indio Este    | 80.2                                                  | 0.00                             | 0.69   | 79    | 0.13   | 0.00    | 0.00    | 0.01 | 80.2  | 0.00              | 0.86   | 99.0  | 0.16   | 0.00    | 0.00    | 0.02 | 100   |
| Ciri Grande   | 194                                                   | 0.00                             | 72.5   | 122   | 0.00   | 0.01    | 0.00    | 0.00 | 194   | 0.00              | 37.3   | 62.7  | 0.00   | 0.01    | 0.00    | 0.00 | 100   |
| Trinidad      | 170                                                   | 0.00                             | 76.8   | 92.1  | 0.00   | 0.57    | 0.00    | 0.00 | 170   | 0.00              | 45.3   | 54.3  | 0.00   | 0.34    | 0.00    | 0.00 | 100   |
| Cano Quebrado | 65.7                                                  | 13.6                             | 50.5   | 1.38  | 0.00   | 0.30    | 0.00    | 0.00 | 65.7  | 20.6              | 76.8   | 2.09  | 0.00   | 0.45    | 0.00    | 0.00 | 100   |
| River         | Area upstream of sampling location (km <sup>2</sup> ) | Total area (in km <sup>2</sup> ) |        |       |        |         |         |      |       | Total area (in %) |        |       |        |         |         |      |       |
|               |                                                       | 1999                             |        |       |        |         |         |      |       | 1999              |        |       |        |         |         |      |       |
|               |                                                       | Crops                            | Mosaic | Trees | Shrubs | Grasses | Flooded | Bare | Total | Crops             | Mosaic | Trees | Shrubs | Grasses | Flooded | Bare | Total |
| Gatun         | 115                                                   | 0.00                             | 27     | 87.3  | 0.00   | 0.00    | 0.00    | 0.00 | 115   | 0.00              | 23.9   | 76.1  | 0.00   | 0.00    | 0.00    | 0.00 | 100   |
| Boqueron      | 92.1                                                  | 0.00                             | 6.89   | 85.2  | 0.00   | 0.00    | 0.05    | 0.00 | 92.1  | 0.00              | 7.47   | 92.5  | 0.00   | 0.00    | 0.06    | 0.00 | 100   |
| Pequini       | 144                                                   | 0.00                             | 0.00   | 144   | 0.00   | 0.00    | 0.00    | 0.00 | 144   | 0.00              | 0.00   | 100   | 0.00   | 0.00    | 0.00    | 0.00 | 100   |
| Chagres       | 407                                                   | 0.00                             | 0.81   | 406   | 0.00   | 0.00    | 0.36    | 0.17 | 407   | 0.00              | 0.20   | 99.7  | 0.00   | 0.00    | 0.09    | 0.04 | 100   |
| Indio Este    | 80.2                                                  | 0.00                             | 0.69   | 79.4  | 0.13   | 0.00    | 0.00    | 0.01 | 80.3  | 0.00              | 0.86   | 98.96 | 0.16   | 0.00    | 0.00    | 0.02 | 100   |
| Ciri Grande   | 194                                                   | 0.00                             | 73     | 122   | 0.00   | 0.01    | 0.00    | 0.00 | 194   | 0.00              | 37.3   | 62.7  | 0.00   | 0.01    | 0.00    | 0.00 | 100   |
| Trinidad      | 170                                                   | 0.00                             | 77     | 92.1  | 0.00   | 0.57    | 0.00    | 0.00 | 170   | 0.00              | 45.3   | 54.3  | 0.00   | 0.34    | 0.00    | 0.00 | 100   |
| Cano Quebrado | 65.7                                                  | 13.6                             | 50     | 1.38  | 0.00   | 0.30    | 0.00    | 0.00 | 65.7  | 20.6              | 76.8   | 2.09  | 0.00   | 0.45    | 0.00    | 0.00 | 100   |
| River         | Area upstream of sampling location (km <sup>2</sup> ) | Total area (in km <sup>2</sup> ) |        |       |        |         |         |      |       | Total area (in %) |        |       |        |         |         |      |       |
|               |                                                       | 2000                             |        |       |        |         |         |      |       | 2000              |        |       |        |         |         |      |       |
|               |                                                       | Crops                            | Mosaic | Trees | Shrubs | Grasses | Flooded | Bare | Total | Crops             | Mosaic | Trees | Shrubs | Grasses | Flooded | Bare | Total |
| Gatun         | 115                                                   | 0.00                             | 28.2   | 86.5  | 0.00   | 0.00    | 0.00    | 0.00 | 115   | 0.00              | 24.6   | 75.4  | 0.00   | 0.00    | 0.00    | 0.00 | 100   |
| Boqueron      | 92.1                                                  | 0.00                             | 6.89   | 85.2  | 0.00   | 0.00    | 0.05    | 0.00 | 92.1  | 0.00              | 7.47   | 92.5  | 0.00   | 0.00    | 0.06    | 0.00 | 100   |
| Pequini       | 144                                                   | 0.00                             | 0.00   | 144   | 0.00   | 0.00    | 0.00    | 0.00 | 144   | 0.00              | 0.00   | 100   | 0.00   | 0.00    | 0.00    | 0.00 | 100   |
| Chagres       | 407                                                   | 0.00                             | 0.81   | 406   | 0.00   | 0.00    | 0.36    | 0.17 | 407   | 0.00              | 0.20   | 99.7  | 0.00   | 0.00    | 0.09    | 0.04 | 100   |
| Indio Este    | 80.2                                                  | 0.00                             | 0.69   | 79.4  | 0.13   | 0.00    | 0.00    | 0.01 | 80.2  | 0.00              | 0.86   | 99.0  | 0.16   | 0.00    | 0.00    | 0.02 | 100   |
| Ciri Grande   | 194                                                   | 0.00                             | 72.5   | 122   | 0.00   | 0.01    | 0.00    | 0.00 | 194   | 0.00              | 37.3   | 62.7  | 0.00   | 0.01    | 0.00    | 0.00 | 100   |
| Trinidad      | 170                                                   | 0.00                             | 76.8   | 92.1  | 0.00   | 0.57    | 0.00    | 0.00 | 170   | 0.00              | 45.3   | 54.3  | 0.00   | 0.34    | 0.00    | 0.00 | 100   |
| Cano Quebrado | 65.7                                                  | 13.6                             | 50.5   | 1.38  | 0.00   | 0.30    | 0.00    | 0.00 | 65.7  | 20.6              | 76.8   | 2.09  | 0.00   | 0.45    | 0.00    | 0.00 | 100   |



**Table S7 (cont'd):** Total area (in km<sup>2</sup> and %) of land use/landcover (LU/LC) categories above each sampling location (1998-2015)

| River         | Area upstream of sampling location (km <sup>2</sup> ) | Total area (in km <sup>2</sup> ) |        |       |        |         |         |      |       | Total area (in %) |        |       |        |         |         |      |       |
|---------------|-------------------------------------------------------|----------------------------------|--------|-------|--------|---------|---------|------|-------|-------------------|--------|-------|--------|---------|---------|------|-------|
|               |                                                       | 2001                             |        |       |        |         |         |      |       | 2001              |        |       |        |         |         |      |       |
|               |                                                       | Crops                            | Mosaic | Trees | Shrubs | Grasses | Flooded | Bare | Total | Crops             | Mosaic | Trees | Shrubs | Grasses | Flooded | Bare | Total |
| Gatun         | 115                                                   | 0.00                             | 29.0   | 85.7  | 0.00   | 0.00    | 0.00    | 0.00 | 115   | 0.00              | 25.3   | 74.7  | 0.00   | 0.00    | 0.00    | 0.00 | 100   |
| Boqueron      | 92.1                                                  | 0.00                             | 5.81   | 86.3  | 0.00   | 0.00    | 0.05    | 0.00 | 92.1  | 0.00              | 6.30   | 93.6  | 0.00   | 0.00    | 0.06    | 0.00 | 100   |
| Pequini       | 144                                                   | 0.00                             | 0.00   | 144   | 0.00   | 0.00    | 0.00    | 0.00 | 144   | 0.00              | 0.00   | 100   | 0.00   | 0.00    | 0.00    | 0.00 | 100   |
| Chagres       | 407                                                   | 0.00                             | 0.81   | 406   | 0.00   | 0.00    | 0.36    | 0.17 | 407   | 0.00              | 0.20   | 99.7  | 0.00   | 0.00    | 0.09    | 0.04 | 100   |
| Indio Este    | 80.2                                                  | 0.00                             | 0.69   | 79.4  | 0.13   | 0.00    | 0.00    | 0.01 | 80.2  | 0.00              | 0.86   | 99.0  | 0.16   | 0.00    | 0.00    | 0.02 | 100   |
| Ciri Grande   | 194                                                   | 0.00                             | 72.5   | 122   | 0.00   | 0.01    | 0.00    | 0.00 | 194   | 0.00              | 37.3   | 62.7  | 0.00   | 0.01    | 0.00    | 0.00 | 100   |
| Trinidad      | 170                                                   | 0.00                             | 75.5   | 93.5  | 0.00   | 0.57    | 0.00    | 0.00 | 170   | 0.00              | 44.5   | 55.1  | 0.00   | 0.34    | 0.00    | 0.00 | 100   |
| Cano Quebrado | 65.7                                                  | 13.6                             | 50.5   | 1.38  | 0.00   | 0.30    | 0.00    | 0.00 | 65.7  | 20.6              | 76.8   | 2.09  | 0.00   | 0.45    | 0.00    | 0.00 | 100   |
| River         | Area upstream of sampling location (km <sup>2</sup> ) | Total area (in km <sup>2</sup> ) |        |       |        |         |         |      |       | Total area (in %) |        |       |        |         |         |      |       |
|               |                                                       | 2002                             |        |       |        |         |         |      |       | 2002              |        |       |        |         |         |      |       |
|               |                                                       | Crops                            | Mosaic | Trees | Shrubs | Grasses | Flooded | Bare | Total | Crops             | Mosaic | Trees | Shrubs | Grasses | Flooded | Bare | Total |
| Gatun         | 115                                                   | 0.00                             | 29.2   | 85.5  | 0.00   | 0.00    | 0.00    | 0.00 | 115   | 0.00              | 25.5   | 74.5  | 0.00   | 0.00    | 0.00    | 0.00 | 100   |
| Boqueron      | 92.1                                                  | 0.00                             | 4.46   | 87.6  | 0.00   | 0.00    | 0.05    | 0.00 | 92.1  | 0.00              | 4.84   | 95.1  | 0.00   | 0.00    | 0.06    | 0.00 | 100   |
| Pequini       | 144                                                   | 0.00                             | 0.00   | 144   | 0.00   | 0.00    | 0.00    | 0.00 | 144   | 0.00              | 0.00   | 100   | 0.00   | 0.00    | 0.00    | 0.00 | 100   |
| Chagres       | 407                                                   | 0.00                             | 0.81   | 406   | 0.00   | 0.00    | 0.36    | 0.17 | 407   | 0.00              | 0.20   | 99.7  | 0.00   | 0.00    | 0.09    | 0.04 | 100   |
| Indio Este    | 80.2                                                  | 0.00                             | 0.69   | 79.4  | 0.13   | 0.00    | 0.00    | 0.01 | 80.2  | 0.00              | 0.86   | 99.0  | 0.16   | 0.00    | 0.00    | 0.02 | 100   |
| Ciri Grande   | 194                                                   | 0.00                             | 72.5   | 122   | 0.00   | 0.01    | 0.00    | 0.00 | 194   | 0.00              | 37.3   | 62.7  | 0.00   | 0.01    | 0.00    | 0.00 | 100   |
| Trinidad      | 170                                                   | 0.00                             | 75.5   | 93.5  | 0.00   | 0.57    | 0.00    | 0.00 | 170   | 0.00              | 44.5   | 55.1  | 0.00   | 0.34    | 0.00    | 0.00 | 100   |
| Cano Quebrado | 65.7                                                  | 13.6                             | 50.5   | 1.38  | 0.00   | 0.30    | 0.00    | 0.00 | 65.7  | 20.6              | 76.8   | 2.09  | 0.00   | 0.45    | 0.00    | 0.00 | 100   |
| River         | Area upstream of sampling location (km <sup>2</sup> ) | Total area (in km <sup>2</sup> ) |        |       |        |         |         |      |       | Total area (in %) |        |       |        |         |         |      |       |
|               |                                                       | 2003                             |        |       |        |         |         |      |       | 2003              |        |       |        |         |         |      |       |
|               |                                                       | Crops                            | Mosaic | Trees | Shrubs | Grasses | Flooded | Bare | Total | Crops             | Mosaic | Trees | Shrubs | Grasses | Flooded | Bare | Total |
| Gatun         | 115                                                   | 0.00                             | 29.2   | 85.5  | 0.00   | 0.00    | 0.00    | 0.00 | 115   | 0.00              | 25.5   | 74.5  | 0.00   | 0.00    | 0.00    | 0.00 | 100   |
| Boqueron      | 92.1                                                  | 0.00                             | 4.46   | 87.6  | 0.00   | 0.00    | 0.05    | 0.00 | 92.1  | 0.00              | 4.84   | 95.1  | 0.00   | 0.00    | 0.06    | 0.00 | 100   |
| Pequini       | 144                                                   | 0.00                             | 0.00   | 144   | 0.00   | 0.00    | 0.00    | 0.00 | 144   | 0.00              | 0.00   | 100   | 0.00   | 0.00    | 0.00    | 0.00 | 100   |
| Chagres       | 407                                                   | 0.00                             | 0.81   | 406   | 0.00   | 0.00    | 0.36    | 0.17 | 407   | 0.00              | 0.20   | 99.7  | 0.00   | 0.00    | 0.09    | 0.04 | 100   |
| Indio Este    | 80.2                                                  | 0.00                             | 0.69   | 79.4  | 0.13   | 0.00    | 0.00    | 0.01 | 80.2  | 0.00              | 0.86   | 99.0  | 0.16   | 0.00    | 0.00    | 0.02 | 100   |
| Ciri Grande   | 194                                                   | 0.00                             | 72.5   | 122   | 0.00   | 0.01    | 0.00    | 0.00 | 194   | 0.00              | 37.3   | 62.7  | 0.00   | 0.01    | 0.00    | 0.00 | 100   |
| Trinidad      | 170                                                   | 0.00                             | 75.5   | 93.5  | 0.00   | 0.57    | 0.00    | 0.00 | 170   | 0.00              | 44.5   | 55.1  | 0.00   | 0.34    | 0.00    | 0.00 | 100   |
| Cano Quebrado | 65.7                                                  | 13.6                             | 49.7   | 2.19  | 0.00   | 0.30    | 0.00    | 0.00 | 65.7  | 20.6              | 75.6   | 3.33  | 0.00   | 0.45    | 0.00    | 0.00 | 100   |

**Table S7 (cont'd):** Total area (in km<sup>2</sup> and %) of land use/landcover (LU/LC) categories above each sampling location (1998-2015)

| River         | Area upstream of sampling location (km <sup>2</sup> ) | Total area (in km <sup>2</sup> ) |        |       |        |         |         |      |       | Total area (in %) |        |       |        |         |         |      |       |
|---------------|-------------------------------------------------------|----------------------------------|--------|-------|--------|---------|---------|------|-------|-------------------|--------|-------|--------|---------|---------|------|-------|
|               |                                                       | 2004                             |        |       |        |         |         |      |       | 2004              |        |       |        |         |         |      |       |
|               |                                                       | Crops                            | Mosaic | Trees | Shrubs | Grasses | Flooded | Bare | Total | Crops             | Mosaic | Trees | Shrubs | Grasses | Flooded | Bare | Total |
| Gatun         | 115                                                   | 0.00                             | 28.7   | 86.1  | 0.00   | 0.00    | 0.00    | 0.00 | 115   | 0.00              | 25.0   | 75.0  | 0.00   | 0.00    | 0.00    | 0.00 | 100   |
| Boqueron      | 92.1                                                  | 0.00                             | 3.83   | 88.1  | 0.00   | 0.00    | 0.23    | 0.00 | 92.1  | 0.00              | 4.15   | 95.6  | 0.00   | 0.00    | 0.25    | 0.00 | 100   |
| Pequini       | 144                                                   | 0.00                             | 0.00   | 144   | 0.00   | 0.00    | 0.00    | 0.00 | 144   | 0.00              | 0.00   | 100   | 0.00   | 0.00    | 0.00    | 0.00 | 100   |
| Chagres       | 407                                                   | 0.00                             | 0.81   | 406   | 0.00   | 0.00    | 0.36    | 0.17 | 407   | 0.00              | 0.20   | 99.7  | 0.00   | 0.00    | 0.09    | 0.04 | 100   |
| Indio Este    | 80.2                                                  | 0.00                             | 0.69   | 79    | 0.13   | 0.00    | 0.00    | 0.01 | 80.2  | 0.00              | 0.86   | 99.0  | 0.16   | 0.00    | 0.00    | 0.02 | 100   |
| Ciri Grande   | 194                                                   | 0.00                             | 72.5   | 122   | 0.00   | 0.01    | 0.00    | 0.00 | 194   | 0.00              | 37.3   | 62.7  | 0.00   | 0.01    | 0.00    | 0.00 | 100   |
| Trinidad      | 170                                                   | 0.00                             | 72.5   | 93.5  | 0.00   | 0.57    | 0.00    | 0.00 | 167   | 0.00              | 43.5   | 56.1  | 0.00   | 0.34    | 0.00    | 0.00 | 100   |
| Cano Quebrado | 65.7                                                  | 13.6                             | 49.0   | 2.81  | 0.00   | 0.30    | 0.05    | 0.00 | 65.7  | 20.6              | 74.6   | 4.28  | 0.00   | 0.45    | 0.07    | 0.00 | 100   |
| River         | Area upstream of sampling location (km <sup>2</sup> ) | Total area (in km <sup>2</sup> ) |        |       |        |         |         |      |       | Total area (in %) |        |       |        |         |         |      |       |
|               |                                                       | 2005                             |        |       |        |         |         |      |       | 2005              |        |       |        |         |         |      |       |
|               |                                                       | Crops                            | Mosaic | Trees | Shrubs | Grasses | Flooded | Bare | Total | Crops             | Mosaic | Trees | Shrubs | Grasses | Flooded | Bare | Total |
| Gatun         | 115                                                   | 0.00                             | 28.7   | 86.1  | 0.00   | 0.00    | 0.00    | 0.00 | 115   | 0.00              | 25.0   | 75.0  | 0.00   | 0.00    | 0.00    | 0.00 | 100   |
| Boqueron      | 92.1                                                  | 0.00                             | 3.83   | 88.1  | 0.00   | 0.00    | 0.23    | 0.00 | 92.1  | 0.00              | 4.15   | 95.6  | 0.00   | 0.00    | 0.25    | 0.00 | 100   |
| Pequini       | 144                                                   | 0.00                             | 0.00   | 144   | 0.00   | 0.00    | 0.00    | 0.00 | 144   | 0.00              | 0.00   | 100   | 0.00   | 0.00    | 0.00    | 0.00 | 100   |
| Chagres       | 407                                                   | 0.00                             | 0.81   | 406   | 0.00   | 0.00    | 0.36    | 0.17 | 407   | 0.00              | 0.20   | 99.7  | 0.00   | 0.00    | 0.09    | 0.04 | 100   |
| Indio Este    | 80.2                                                  | 0.00                             | 0.69   | 79.4  | 0.13   | 0.00    | 0.00    | 0.01 | 80.2  | 0.00              | 0.86   | 99.0  | 0.16   | 0.00    | 0.00    | 0.02 | 100   |
| Ciri Grande   | 194                                                   | 0.00                             | 72.5   | 122   | 0.00   | 0.01    | 0.00    | 0.00 | 194   | 0.00              | 37.3   | 62.7  | 0.00   | 0.01    | 0.00    | 0.00 | 100   |
| Trinidad      | 170                                                   | 0.00                             | 75.5   | 93.5  | 0.00   | 0.57    | 0.00    | 0.00 | 170   | 0.00              | 44.5   | 55.1  | 0.00   | 0.34    | 0.00    | 0.00 | 100   |
| Cano Quebrado | 65.7                                                  | 13.6                             | 49.0   | 2.81  | 0.00   | 0.30    | 0.05    | 0.00 | 65.7  | 20.6              | 74.6   | 4.28  | 0.00   | 0.45    | 0.07    | 0.00 | 100   |
| River         | Area upstream of sampling location (km <sup>2</sup> ) | Total area (in km <sup>2</sup> ) |        |       |        |         |         |      |       | Total area (in %) |        |       |        |         |         |      |       |
|               |                                                       | 2006                             |        |       |        |         |         |      |       | 2006              |        |       |        |         |         |      |       |
|               |                                                       | Crops                            | Mosaic | Trees | Shrubs | Grasses | Flooded | Bare | Total | Crops             | Mosaic | Trees | Shrubs | Grasses | Flooded | Bare | Total |
| Gatun         | 115                                                   | 0.00                             | 24.7   | 90.1  | 0.00   | 0.00    | 0.00    | 0.00 | 115   | 0.00              | 21.5   | 78.5  | 0.00   | 0.00    | 0.00    | 0.00 | 100   |
| Boqueron      | 92.1                                                  | 0.00                             | 3.83   | 88.1  | 0.00   | 0.00    | 0.23    | 0.00 | 92.1  | 0.00              | 4.15   | 95.6  | 0.00   | 0.00    | 0.25    | 0.00 | 100   |
| Pequini       | 144                                                   | 0.00                             | 0.00   | 144   | 0.00   | 0.00    | 0.00    | 0.00 | 144   | 0.00              | 0.00   | 100   | 0.00   | 0.00    | 0.00    | 0.00 | 100   |
| Chagres       | 407                                                   | 0.00                             | 0.81   | 406   | 0.00   | 0.00    | 0.36    | 0.17 | 407   | 0.00              | 0.20   | 99.7  | 0.00   | 0.00    | 0.09    | 0.04 | 100   |
| Indio Este    | 80.2                                                  | 0.00                             | 0.69   | 79.4  | 0.13   | 0.00    | 0.00    | 0.01 | 80.2  | 0.00              | 0.86   | 99.0  | 0.16   | 0.00    | 0.00    | 0.02 | 100   |
| Ciri Grande   | 194                                                   | 0.00                             | 72.5   | 122   | 0.00   | 0.01    | 0.00    | 0.00 | 194   | 0.00              | 37.3   | 62.7  | 0.00   | 0.01    | 0.00    | 0.00 | 100   |
| Trinidad      | 170                                                   | 0.00                             | 75.5   | 93.5  | 0.00   | 0.57    | 0.00    | 0.00 | 170   | 0.00              | 44.5   | 55.1  | 0.00   | 0.34    | 0.00    | 0.00 | 100   |
| Cano Quebrado | 65.7                                                  | 13.6                             | 49.0   | 2.81  | 0.00   | 0.30    | 0.05    | 0.00 | 65.7  | 20.6              | 74.6   | 4.28  | 0.00   | 0.45    | 0.07    | 0.00 | 100   |

**Table S7 (cont'd):** Total area (in km<sup>2</sup> and %) of land use/landcover (LU/LC) categories above each sampling location (1998-2015)

| River         | Area upstream of sampling location (km <sup>2</sup> ) | Total area (in km <sup>2</sup> ) |        |       |        |         |         |      |       | Total area (in %) |        |        |        |         |         |      |       |
|---------------|-------------------------------------------------------|----------------------------------|--------|-------|--------|---------|---------|------|-------|-------------------|--------|--------|--------|---------|---------|------|-------|
|               |                                                       | 2007                             |        |       |        |         |         |      |       | 2007              |        |        |        |         |         |      |       |
|               |                                                       | Crops                            | Mosaic | Trees | Shrubs | Grasses | Flooded | Bare | Total | Crops             | Mosaic | Trees  | Shrubs | Grasses | Flooded | Bare | Total |
| Gatun         | 115                                                   | 0.00                             | 18.0   | 96.7  | 0.00   | 0.00    | 0.00    | 0.00 | 115   | 0.00              | 15.7   | 84.3   | 0.00   | 0.00    | 0.00    | 0.00 | 100   |
| Boqueron      | 92.1                                                  | 0.00                             | 3.83   | 88.1  | 0.00   | 0.00    | 0.23    | 0.00 | 92.1  | 0.00              | 4.15   | 95.6   | 0.00   | 0.00    | 0.25    | 0.00 | 100   |
| Pequini       | 144                                                   | 0.00                             | 0.00   | 144   | 0.00   | 0.00    | 0.00    | 0.00 | 144   | 0.00              | 0.00   | 100    | 0.00   | 0.00    | 0.00    | 0.00 | 100   |
| Chagres       | 407                                                   | 0.00                             | 0.81   | 406   | 0.00   | 0.00    | 0.36    | 0.17 | 407   | 0.00              | 0.20   | 99.7   | 0.00   | 0.00    | 0.09    | 0.04 | 100   |
| Indio Este    | 80.2                                                  | 0.00                             | 0.69   | 79.4  | 0.13   | 0.00    | 0.00    | 0.01 | 80.2  | 0.00              | 0.86   | 99.0   | 0.16   | 0.00    | 0.00    | 0.02 | 100   |
| Ciri Grande   | 194                                                   | 0.00                             | 72.5   | 122   | 0.00   | 0.01    | 0.00    | 0.00 | 194   | 0.00              | 37.3   | 62.7   | 0.00   | 0.01    | 0.00    | 0.00 | 100   |
| Trinidad      | 170                                                   | 0.00                             | 75.5   | 93.5  | 0.00   | 0.57    | 0.00    | 0.00 | 170   | 0.00              | 44.5   | 55.1   | 0.00   | 0.34    | 0.00    | 0.00 | 100   |
| Cano Quebrado | 65.7                                                  | 14                               | 49.0   | 2.81  | 0.00   | 0.30    | 0.05    | 0.00 | 65.7  | 20.6              | 74.6   | 4.28   | 0.00   | 0.45    | 0.07    | 0.00 | 100   |
| River         | Area upstream of sampling location (km <sup>2</sup> ) | Total area (in km <sup>2</sup> ) |        |       |        |         |         |      |       | Total area (in %) |        |        |        |         |         |      |       |
|               |                                                       | 2008                             |        |       |        |         |         |      |       | 2008              |        |        |        |         |         |      |       |
|               |                                                       | Crops                            | Mosaic | Trees | Shrubs | Grasses | Flooded | Bare | Total | Crops             | Mosaic | Trees  | Shrubs | Grasses | Flooded | Bare | Total |
| Gatun         | 115                                                   | 0.00                             | 17.1   | 97.6  | 0.00   | 0.00    | 0.00    | 0.00 | 115   | 0.00              | 14.9   | 85.1   | 0.00   | 0.00    | 0.00    | 0.00 | 100   |
| Boqueron      | 92.1                                                  | 0.00                             | 3.83   | 88.1  | 0.00   | 0.00    | 0.23    | 0.00 | 92.1  | 0.00              | 4.15   | 95.6   | 0.00   | 0.00    | 0.25    | 0.00 | 100   |
| Pequini       | 144                                                   | 0.00                             | 0.00   | 144   | 0.00   | 0.00    | 0.00    | 0.00 | 144   | 0.00              | 0.00   | 100.00 | 0.00   | 0.00    | 0.00    | 0.00 | 100   |
| Chagres       | 407                                                   | 0.00                             | 0.81   | 406   | 0.00   | 0.00    | 0.36    | 0.17 | 407   | 0.00              | 0.20   | 99.7   | 0.00   | 0.00    | 0.09    | 0.04 | 100   |
| Indio Este    | 80.2                                                  | 0.00                             | 0.69   | 79.4  | 0.13   | 0.00    | 0.00    | 0.01 | 80.2  | 0.00              | 0.86   | 99.0   | 0.16   | 0.00    | 0.00    | 0.02 | 100   |
| Ciri Grande   | 194                                                   | 0.00                             | 72.0   | 122   | 0.00   | 0.01    | 0.00    | 0.00 | 194   | 0.00              | 37.0   | 63.0   | 0.00   | 0.01    | 0.00    | 0.00 | 100   |
| Trinidad      | 170                                                   | 0.00                             | 75.5   | 93.5  | 0.00   | 0.57    | 0.00    | 0.00 | 170   | 0.00              | 44.5   | 55.1   | 0.00   | 0.34    | 0.00    | 0.00 | 100   |
| Cano Quebrado | 65.7                                                  | 12.9                             | 47.4   | 5.02  | 0.00   | 0.30    | 0.05    | 0.00 | 65.7  | 19.6              | 72.2   | 7.63   | 0.00   | 0.45    | 0.07    | 0.00 | 100   |
| River         | Area upstream of sampling location (km <sup>2</sup> ) | Total area (in km <sup>2</sup> ) |        |       |        |         |         |      |       | Total area (in %) |        |        |        |         |         |      |       |
|               |                                                       | 2009                             |        |       |        |         |         |      |       | 2009              |        |        |        |         |         |      |       |
|               |                                                       | Crops                            | Mosaic | Trees | Shrubs | Grasses | Flooded | Bare | Total | Crops             | Mosaic | Trees  | Shrubs | Grasses | Flooded | Bare | Total |
| Gatun         | 115                                                   | 0.00                             | 15.3   | 99.4  | 0.00   | 0.00    | 0.00    | 0.00 | 115   | 0.00              | 13.4   | 86.6   | 0.00   | 0.00    | 0.00    | 0.00 | 100   |
| Boqueron      | 92.1                                                  | 0.00                             | 1.20   | 90.7  | 0.00   | 0.00    | 0.23    | 0.00 | 92.1  | 0.00              | 1.30   | 98.4   | 0.00   | 0.00    | 0.25    | 0.00 | 100   |
| Pequini       | 144                                                   | 0.00                             | 0.00   | 144   | 0.00   | 0.00    | 0.00    | 0.00 | 144   | 0.00              | 0.00   | 100    | 0.00   | 0.00    | 0.00    | 0.00 | 100   |
| Chagres       | 407                                                   | 0.00                             | 0.81   | 406   | 0.00   | 0.00    | 0.36    | 0.17 | 407   | 0.00              | 0.20   | 99.7   | 0.00   | 0.00    | 0.09    | 0.04 | 100   |
| Indio Este    | 80.2                                                  | 0.00                             | 0.69   | 79.4  | 0.13   | 0.00    | 0.00    | 0.01 | 80.2  | 0.00              | 0.86   | 99.0   | 0.16   | 0.00    | 0.00    | 0.02 | 100   |
| Ciri Grande   | 194                                                   | 0.00                             | 71.0   | 123.4 | 0.00   | 0.01    | 0.00    | 0.00 | 194   | 0.00              | 36.5   | 63.5   | 0.00   | 0.01    | 0.00    | 0.00 | 100   |
| Trinidad      | 170                                                   | 0.00                             | 75.5   | 93.5  | 0.00   | 0.57    | 0.00    | 0.00 | 170   | 0.00              | 44.5   | 55.1   | 0.00   | 0.34    | 0.00    | 0.00 | 100   |
| Cano Quebrado | 65.7                                                  | 12.9                             | 46.4   | 6.07  | 0.00   | 0.30    | 0.05    | 0.00 | 65.7  | 19.6              | 70.6   | 9.24   | 0.00   | 0.45    | 0.07    | 0.00 | 100   |

**Table S7 (cont'd):** Total area (in km<sup>2</sup> and %) of land use/landcover (LU/LC) categories above each sampling location (1998-2015)

| River         | Area upstream of sampling location (km <sup>2</sup> ) | Total area (in km <sup>2</sup> ) |        |       |        |         |         |      |       | Total area (in %) |        |       |        |         |         |      |        |
|---------------|-------------------------------------------------------|----------------------------------|--------|-------|--------|---------|---------|------|-------|-------------------|--------|-------|--------|---------|---------|------|--------|
|               |                                                       | 2010                             |        |       |        |         |         |      |       | 2010              |        |       |        |         |         |      |        |
|               |                                                       | Crops                            | Mosaic | Trees | Shrubs | Grasses | Flooded | Bare | Total | Crops             | Mosaic | Trees | Shrubs | Grasses | Flooded | Bare | Total  |
| Gatun         | 115                                                   | 0.00                             | 14.6   | 100   | 0.00   | 0.00    | 0.00    | 0.00 | 115   | 0.00              | 12.7   | 87.3  | 0.00   | 0.00    | 0.00    | 0.00 | 100    |
| Boqueron      | 92.1                                                  | 0.00                             | 1.20   | 90.7  | 0.00   | 0.00    | 0.23    | 0.00 | 92.1  | 0.00              | 1.30   | 98.4  | 0.00   | 0.00    | 0.25    | 0.00 | 100    |
| Pequini       | 144                                                   | 0.00                             | 0.00   | 144   | 0.00   | 0.00    | 0.00    | 0.00 | 144   | 0.00              | 0.00   | 100   | 0.00   | 0.00    | 0.00    | 0.00 | 100    |
| Chagres       | 407                                                   | 0.00                             | 0.81   | 406   | 0.00   | 0.00    | 0.36    | 0.17 | 407   | 0.00              | 0.20   | 99.7  | 0.00   | 0.00    | 0.09    | 0.04 | 100    |
| Indio Este    | 80.2                                                  | 0.00                             | 0.69   | 79.4  | 0.13   | 0.00    | 0.00    | 0.01 | 80.2  | 0.00              | 0.86   | 99.0  | 0.16   | 0.00    | 0.00    | 0.02 | 100    |
| Ciri Grande   | 194                                                   | 0.00                             | 67.4   | 127   | 0.00   | 0.01    | 0.00    | 0.00 | 194   | 0.00              | 34.7   | 65.3  | 0.00   | 0.01    | 0.00    | 0.00 | 100    |
| Trinidad      | 170                                                   | 0.00                             | 71.3   | 97.7  | 0.00   | 0.57    | 0.00    | 0.00 | 170   | 0.00              | 42.0   | 57.6  | 0.00   | 0.34    | 0.00    | 0.00 | 100    |
| Cano Quebrado | 65.7                                                  | 12.4                             | 45.1   | 7.78  | 0.00   | 0.30    | 0.05    | 0.00 | 65.7  | 18.9              | 68.7   | 11.8  | 0.00   | 0.45    | 0.07    | 0.00 | 100    |
| River         | Area upstream of sampling location (km <sup>2</sup> ) | Total area (in km <sup>2</sup> ) |        |       |        |         |         |      |       | Total area (in %) |        |       |        |         |         |      |        |
|               |                                                       | 2011                             |        |       |        |         |         |      |       | 2011              |        |       |        |         |         |      |        |
|               |                                                       | Crops                            | Mosaic | Trees | Shrubs | Grasses | Flooded | Bare | Total | Crops             | Mosaic | Trees | Shrubs | Grasses | Flooded | Bare | Total  |
| Gatun         | 115                                                   | 0.00                             | 14.2   | 101   | 0.00   | 0.00    | 0.00    | 0.00 | 115   | 0.00              | 12.4   | 87.6  | 0.00   | 0.00    | 0.00    | 0.00 | 100    |
| Boqueron      | 92.1                                                  | 0.00                             | 1.20   | 90.8  | 0.00   | 0.00    | 0.23    | 0.00 | 92.2  | 0.00              | 1.30   | 98.4  | 0.00   | 0.00    | 0.25    | 0.00 | 100    |
| Pequini       | 144                                                   | 0.00                             | 0.00   | 144   | 0.00   | 0.00    | 0.00    | 0.00 | 144   | 0.00              | 0.00   | 100   | 0.00   | 0.00    | 0.00    | 0.00 | 100    |
| Chagres       | 407                                                   | 0.00                             | 0.81   | 406   | 0.00   | 0.00    | 0.36    | 0.17 | 407   | 0.00              | 0.20   | 99.7  | 0.00   | 0.00    | 0.09    | 0.04 | 100    |
| Indio Este    | 80.2                                                  | 0.00                             | 0.69   | 79.4  | 0.13   | 0.00    | 0.00    | 0.01 | 80.2  | 0.00              | 0.86   | 99.0  | 0.16   | 0.00    | 0.00    | 0.02 | 100    |
| Ciri Grande   | 194                                                   | 0.00                             | 65.3   | 129   | 0.00   | 0.01    | 0.00    | 0.00 | 194   | 0.00              | 33.6   | 66.4  | 0.00   | 0.01    | 0.00    | 0.00 | 100    |
| Trinidad      | 170                                                   | 0.00                             | 69.5   | 99.5  | 0.00   | 0.57    | 0.00    | 0.00 | 170   | 0.00              | 41.0   | 58.7  | 0.00   | 0.34    | 0.00    | 0.00 | 100    |
| Cano Quebrado | 65.7                                                  | 12.4                             | 45.1   | 7.78  | 0.00   | 0.30    | 0.05    | 0.00 | 65.7  | 18.9              | 68.7   | 11.8  | 0.00   | 0.45    | 0.07    | 0.00 | 100    |
| River         | Area upstream of sampling location (km <sup>2</sup> ) | Total area (in km <sup>2</sup> ) |        |       |        |         |         |      |       | Total area (in %) |        |       |        |         |         |      |        |
|               |                                                       | 2012                             |        |       |        |         |         |      |       | 2012              |        |       |        |         |         |      |        |
|               |                                                       | Crops                            | Mosaic | Trees | Shrubs | Grasses | Flooded | Bare | Total | Crops             | Mosaic | Trees | Shrubs | Grasses | Flooded | Bare | Total  |
| Gatun         | 115                                                   | 0.00                             | 14.2   | 101   | 0.00   | 0.00    | 0.00    | 0.00 | 115   | 0.00              | 12.4   | 87.6  | 0.00   | 0.00    | 0.00    | 0.00 | 100.00 |
| Boqueron      | 92.1                                                  | 0.00                             | 1.20   | 90.8  | 0.00   | 0.00    | 0.23    | 0.00 | 92.2  | 0.00              | 1.30   | 98.4  | 0.00   | 0.00    | 0.25    | 0.00 | 100.00 |
| Pequini       | 144                                                   | 0.00                             | 0.00   | 144   | 0.00   | 0.00    | 0.00    | 0.00 | 144   | 0.00              | 0.00   | 100   | 0.00   | 0.00    | 0.00    | 0.00 | 100.00 |
| Chagres       | 407                                                   | 0.00                             | 0.81   | 406   | 0.00   | 0.00    | 0.36    | 0.17 | 407   | 0.00              | 0.20   | 99.7  | 0.00   | 0.00    | 0.09    | 0.04 | 100.00 |
| Indio Este    | 80.2                                                  | 0.00                             | 0.69   | 79.4  | 0.13   | 0.00    | 0.00    | 0.01 | 80.2  | 0.00              | 0.86   | 99.0  | 0.16   | 0.00    | 0.00    | 0.02 | 100.00 |
| Ciri Grande   | 194                                                   | 0.00                             | 65.3   | 129   | 0.00   | 0.01    | 0.00    | 0.00 | 194   | 0.00              | 33.6   | 66.4  | 0.00   | 0.01    | 0.00    | 0.00 | 100.00 |
| Trinidad      | 170                                                   | 0.00                             | 68.7   | 100   | 0.00   | 0.57    | 0.00    | 0.00 | 170   | 0.00              | 40.5   | 59.1  | 0.00   | 0.34    | 0.00    | 0.00 | 100.00 |
| Cano Quebrado | 65.7                                                  | 12.4                             | 45.1   | 7.80  | 0.00   | 0.30    | 0.05    | 0.00 | 65.7  | 18.9              | 68.7   | 11.9  | 0.00   | 0.45    | 0.07    | 0.00 | 100.00 |

**Table S7 (cont'd):** Total area (in km<sup>2</sup> and %) of land use/landcover (LU/LC) categories above each sampling location (1998-2015)

| River         | Area upstream of sampling location (km <sup>2</sup> ) | Total area (in km <sup>2</sup> ) |        |       |        |         |         |      |       | Total area (in %) |        |       |        |         |         |      |       |
|---------------|-------------------------------------------------------|----------------------------------|--------|-------|--------|---------|---------|------|-------|-------------------|--------|-------|--------|---------|---------|------|-------|
|               |                                                       | 2013                             |        |       |        |         |         |      |       | 2013              |        |       |        |         |         |      |       |
|               |                                                       | Crops                            | Mosaic | Trees | Shrubs | Grasses | Flooded | Bare | Total | Crops             | Mosaic | Trees | Shrubs | Grasses | Flooded | Bare | Total |
| Gatun         | 115                                                   | 0.00                             | 12.6   | 102   | 0.00   | 0.00    | 0.00    | 0.00 | 115   | 0.00              | 11.0   | 89.0  | 0.00   | 0.00    | 0.00    | 0.00 | 100   |
| Boqueron      | 92.1                                                  | 0.00                             | 1.10   | 90.8  | 0.00   | 0.00    | 0.23    | 0.00 | 92.1  | 0.00              | 1.20   | 98.5  | 0.00   | 0.00    | 0.25    | 0.00 | 100   |
| Pequini       | 144                                                   | 0.00                             | 0.00   | 144   | 0.00   | 0.00    | 0.00    | 0.00 | 144   | 0.00              | 0.00   | 100   | 0.00   | 0.00    | 0.00    | 0.00 | 100   |
| Chagres       | 407                                                   | 0.00                             | 0.81   | 406   | 0.00   | 0.00    | 0.36    | 0.17 | 407   | 0.00              | 0.20   | 99.7  | 0.00   | 0.00    | 0.09    | 0.04 | 100   |
| Indio Este    | 80.2                                                  | 0.00                             | 0.69   | 79.4  | 0.13   | 0.00    | 0.00    | 0.01 | 80.2  | 0.00              | 0.86   | 99.0  | 0.16   | 0.00    | 0.00    | 0.02 | 100   |
| Ciri Grande   | 194                                                   | 0.00                             | 62.0   | 132   | 0.00   | 0.01    | 0.00    | 0.00 | 194   | 0.00              | 31.9   | 68.1  | 0.00   | 0.01    | 0.00    | 0.00 | 100   |
| Trinidad      | 170                                                   | 0.00                             | 68.7   | 100   | 0.00   | 0.57    | 0.00    | 0.00 | 170   | 0.00              | 40.5   | 59.1  | 0.00   | 0.34    | 0.00    | 0.00 | 100   |
| Cano Quebrado | 65.7                                                  | 12.4                             | 45.1   | 7.80  | 0.00   | 0.30    | 0.05    | 0.00 | 65.7  | 18.9              | 68.7   | 11.9  | 0.00   | 0.45    | 0.07    | 0.00 | 100   |
| River         | Area upstream of sampling location (km <sup>2</sup> ) | Total area (in km <sup>2</sup> ) |        |       |        |         |         |      |       | Total area (in %) |        |       |        |         |         |      |       |
|               |                                                       | 2014                             |        |       |        |         |         |      |       | 2014              |        |       |        |         |         |      |       |
|               |                                                       | Crops                            | Mosaic | Trees | Shrubs | Grasses | Flooded | Bare | Total | Crops             | Mosaic | Trees | Shrubs | Grasses | Flooded | Bare | Total |
| Gatun         | 115                                                   | 0.00                             | 12.6   | 102   | 0.00   | 0.00    | 0.00    | 0.00 | 115   | 0.00              | 11.0   | 89.0  | 0.00   | 0.00    | 0.00    | 0.00 | 100   |
| Boqueron      | 92.1                                                  | 0.00                             | 1.10   | 90.8  | 0.00   | 0.00    | 0.23    | 0.00 | 92.1  | 0.00              | 1.20   | 98.5  | 0.00   | 0.00    | 0.25    | 0.00 | 100   |
| Pequini       | 144                                                   | 0.00                             | 0.00   | 144   | 0.00   | 0.00    | 0.00    | 0.00 | 144   | 0.00              | 0.00   | 100   | 0.00   | 0.00    | 0.00    | 0.00 | 100   |
| Chagres       | 407                                                   | 0.00                             | 0.81   | 406   | 0.00   | 0.00    | 0.36    | 0.17 | 407   | 0.00              | 0.20   | 99.7  | 0.00   | 0.00    | 0.09    | 0.04 | 100   |
| Indio Este    | 80.2                                                  | 0.00                             | 0.69   | 79.4  | 0.13   | 0.00    | 0.00    | 0.01 | 80.2  | 0.00              | 0.86   | 99.0  | 0.16   | 0.00    | 0.00    | 0.02 | 100   |
| Ciri Grande   | 194                                                   | 0.00                             | 55.6   | 139   | 0.00   | 0.01    | 0.00    | 0.00 | 194   | 0.00              | 28.6   | 71.4  | 0.00   | 0.01    | 0.00    | 0.00 | 100   |
| Trinidad      | 170                                                   | 0.00                             | 56.8   | 112   | 0.00   | 0.57    | 0.00    | 0.00 | 170   | 0.00              | 33.5   | 66.2  | 0.00   | 0.34    | 0.00    | 0.00 | 100   |
| Cano Quebrado | 65.7                                                  | 12.4                             | 45.1   | 7.80  | 0.00   | 0.30    | 0.05    | 0.00 | 65.7  | 18.9              | 68.7   | 11.9  | 0.00   | 0.45    | 0.07    | 0.00 | 100   |
| River         | Area upstream of sampling location (km <sup>2</sup> ) | Total area (in km <sup>2</sup> ) |        |       |        |         |         |      |       | Total area (in %) |        |       |        |         |         |      |       |
|               |                                                       | 2015                             |        |       |        |         |         |      |       | 2015              |        |       |        |         |         |      |       |
|               |                                                       | Crops                            | Mosaic | Trees | Shrubs | Grasses | Flooded | Bare | Total | Crops             | Mosaic | Trees | Shrubs | Grasses | Flooded | Bare | Total |
| Gatun         | 115                                                   | 0.00                             | 12.6   | 102   | 0.00   | 0.00    | 0.00    | 0.00 | 115   | 0.00              | 11.0   | 89.0  | 0.00   | 0.00    | 0.00    | 0.00 | 100   |
| Boqueron      | 92.1                                                  | 0.00                             | 1.10   | 90.8  | 0.00   | 0.00    | 0.23    | 0.00 | 92.1  | 0.00              | 1.20   | 98.5  | 0.00   | 0.00    | 0.25    | 0.00 | 100   |
| Pequini       | 144                                                   | 0.00                             | 0.00   | 144   | 0.00   | 0.00    | 0.00    | 0.00 | 144   | 0.00              | 0.00   | 100   | 0.00   | 0.00    | 0.00    | 0.00 | 100   |
| Chagres       | 407                                                   | 0.00                             | 0.81   | 406   | 0.00   | 0.00    | 0.36    | 0.17 | 407   | 0.00              | 0.20   | 99.7  | 0.00   | 0.00    | 0.09    | 0.04 | 100   |
| Indio Este    | 80.2                                                  | 0.00                             | 0.69   | 79.4  | 0.13   | 0.00    | 0.00    | 0.01 | 80.2  | 0.00              | 0.86   | 99.0  | 0.16   | 0.00    | 0.00    | 0.02 | 100   |
| Ciri Grande   | 194                                                   | 0.00                             | 55.6   | 139   | 0.00   | 0.01    | 0.00    | 0.00 | 194   | 0.00              | 28.6   | 71.4  | 0.00   | 0.01    | 0.00    | 0.00 | 100   |
| Trinidad      | 170                                                   | 0.00                             | 56.8   | 112   | 0.00   | 0.57    | 0.00    | 0.00 | 170   | 0.00              | 33.5   | 66.2  | 0.00   | 0.34    | 0.00    | 0.00 | 100   |
| Cano Quebrado | 65.7                                                  | 12.4                             | 45.1   | 7.80  | 0.00   | 0.30    | 0.05    | 0.00 | 65.7  | 18.9              | 68.7   | 11.9  | 0.00   | 0.45    | 0.07    | 0.00 | 100   |

**Table S7 (cont'd):** Total area (in km<sup>2</sup> and %) of land use/landcover (LU/LC) categories above each sampling location (1998-2015)

| River         | Area upstream of sampling location (km <sup>2</sup> ) | Total area (in km <sup>2</sup> ) |        |       |        |         |         |      |       | Total area (in %) |        |       |        |         |         |      |       |
|---------------|-------------------------------------------------------|----------------------------------|--------|-------|--------|---------|---------|------|-------|-------------------|--------|-------|--------|---------|---------|------|-------|
|               |                                                       | LTA                              |        |       |        |         |         |      |       | LTA               |        |       |        |         |         |      |       |
|               |                                                       | Crops                            | Mosaic | Trees | Shrubs | Grasses | Flooded | Bare | Total | Crops             | Mosaic | Trees | Shrubs | Grasses | Flooded | Bare | Total |
| Gatun         | 115                                                   | 0.00                             | 21.2   | 93.6  | 0.00   | 0.00    | 0.00    | 0.00 | 115   | 0.00              | 18.4   | 81.6  | 0.00   | 0.00    | 0.00    | 0.00 | 100   |
| Boqueron      | 92.1                                                  | 0.00                             | 3.48   | 88.5  | 0.00   | 0.00    | 0.17    | 0.00 | 92.1  | 0.00              | 3.77   | 96.0  | 0.00   | 0.00    | 0.19    | 0.00 | 100   |
| Pequini       | 144                                                   | 0.00                             | 0.00   | 144   | 0.00   | 0.00    | 0.00    | 0.00 | 144   | 0.00              | 0.00   | 100   | 0.00   | 0.00    | 0.00    | 0.00 | 100   |
| Chagres       | 407                                                   | 0.00                             | 0.81   | 406   | 0.00   | 0.00    | 0.36    | 0.17 | 407   | 0.00              | 0.20   | 99.7  | 0.00   | 0.00    | 0.09    | 0.04 | 100   |
| Indio Este    | 80.2                                                  | 0.00                             | 0.69   | 79.4  | 0.13   | 0.00    | 0.00    | 0.01 | 80.2  | 0.00              | 0.86   | 99.0  | 0.16   | 0.00    | 0.00    | 0.02 | 100   |
| Ciri Grande   | 194                                                   | 0.00                             | 68.9   | 126   | 0.00   | 0.01    | 0.00    | 0.00 | 194   | 0.00              | 35.4   | 64.6  | 0.00   | 0.01    | 0.00    | 0.00 | 100   |
| Trinidad      | 170                                                   | 0.00                             | 72.2   | 96.7  | 0.00   | 0.57    | 0.00    | 0.00 | 169   | 0.00              | 42.6   | 57.1  | 0.00   | 0.34    | 0.00    | 0.00 | 100   |
| Cano Quebrado | 65.7                                                  | 13.1                             | 47.9   | 4.34  | 0.00   | 0.30    | 0.03    | 0.00 | 65.7  | 20.0              | 72.9   | 6.61  | 0.00   | 0.45    | 0.05    | 0.00 | 100   |

**Table S8:** Percent change in LULC for PCW watersheds from 1998-2015

| River                      | Crops | Mosaic | Trees | Shrubs | Grasses | Flooded | Bare |
|----------------------------|-------|--------|-------|--------|---------|---------|------|
| <i>North side of canal</i> |       |        |       |        |         |         |      |
| Gatun                      |       | -10.4% | 10.4% |        |         |         |      |
| Boqueron                   |       | -6.3%  | 6.1%  |        |         | 0.2%    |      |
| Pequini                    |       |        |       |        |         |         |      |
| Chagres                    |       |        |       |        |         |         |      |
| Indio Este                 |       |        |       |        |         |         |      |
| <i>South side of canal</i> |       |        |       |        |         |         |      |
| Ciri Grande                |       | -8.7%  | 8.7%  |        |         |         |      |
| Trinidad                   |       | -11.8% | 11.8% |        |         |         |      |
| Cano Quebrado              | -1.7% | -8.2%  | 9.8%  |        |         |         |      |

**Table S9:** Mixed-model analysis evaluating discharge, cation flux, sediment flux, as a function of both season and ENSO conditions

| AiC Value                         | Parameter        | Parameter slope estimate $\beta$ | DF    | t-ratio | p-value |
|-----------------------------------|------------------|----------------------------------|-------|---------|---------|
| <i>Discharge</i><br>-466.1773     | Intercept        | 0.571                            | 5.1   | 4.74    | 0.0049  |
|                                   | TMI <sup>1</sup> | 0.0578                           | 1275  | 35.74   | <0.001  |
|                                   | ONI <sup>2</sup> | -0.0672                          | 1275  | -8.8    | <0.001  |
|                                   | TMI * ONI        | 0.00069                          | 1275  | 3.40    | 0.0007  |
| <i>Cation Flux</i><br>-464.8108   | Intercept        | 0.846                            | 5.1   | 6.37    | 0.0013  |
|                                   | TMI <sup>1</sup> | 0.0578                           | 1275  | 35.74   | <0.001  |
|                                   | ONI <sup>2</sup> | -0.0673                          | 1275  | -8.8    | <0.001  |
|                                   | TMI * ONI        | 0.0069                           | 1275  | 3.41    | 0.0007  |
| <i>Sediment Flux</i><br>-114.2431 | Intercept        | 1.294                            | 8.4   | 28.11   | <0.001  |
|                                   | TMI <sup>1</sup> | 0.0560                           | 17.86 | 17.86   | <0.001  |
|                                   | ONI <sup>2</sup> | 0.1334                           | 3.36  | 3.36    | 0.0009  |
|                                   | TMI * ONI        | -0.0075                          | -1.94 | -1.94   | 0.0532  |

<sup>1</sup>TMI = tri-monthly interval (e.g. DJF)

<sup>2</sup>ONI = oceanic niño index value



**Table S10:** Data Summary and  $r^2$  values for weathering equations

| Watershed                  | Daily hydrological data | Daily suspended sediment data | Individual Chemistry Measurements (yrs of record) | Total # of chemistry measurements | Na   | K    | Ca   | Mg   |
|----------------------------|-------------------------|-------------------------------|---------------------------------------------------|-----------------------------------|------|------|------|------|
| <i>North side of canal</i> |                         |                               |                                                   |                                   |      |      |      |      |
| Gatun                      | 1998 - 2015             | 2005 - 2015                   | 2003 -2005, 2007, 2011, 2013, 2014                | 100                               | 0.90 | 0.96 | 0.84 | 0.93 |
| Boqueron                   | 1998 - 2015             | 2005 - 2015                   | 2008 -2010, 2013, 2014                            | 55                                | 0.88 | 0.84 | 0.69 | 0.75 |
| Pequini                    | 1998 - 2015             | 2005 - 2015                   | 2003 -2005, 2007 - 2011, 2013, 2014               | 112                               | 0.92 | 0.88 | 0.78 | 0.91 |
| Chagres                    | 1998 - 2015             | 2005 - 2015                   | 2003 -2005, 2007 -2011, 2013, 2014                | 99                                | 0.57 | 0.80 | 0.57 | 0.84 |
| Indio Este                 | 2008 - 2015             | N/A                           | 2013 -2014                                        | 24                                | 0.87 | 0.87 | 0.98 | 0.88 |
| <i>South side of canal</i> |                         |                               |                                                   |                                   |      |      |      |      |
| Ciri Grande                | 1998 - 2015             | 2005 - 2015                   | 2003 -2005, 2007, 2011, 2013, 2014                | 78                                | 0.68 | 0.89 | 0.74 | 0.77 |
| Trinidad                   | 1998 - 2015             | 2005 - 2015                   | 2003 -2005, 2007, 2011, 2013, 2014                | 79                                | 0.79 | 0.93 | 0.80 | 0.88 |
| Cano Quebrado              | 2005 - 2015             | 2005 - 2015                   | 2010                                              | 9                                 | 0.98 | 0.92 | 0.96 | 0.83 |

**Table 11: ESA-CII landcover classes in study area**

---

| ESA-CII Class | Label                                                                              |
|---------------|------------------------------------------------------------------------------------|
| 10            | Cropland, rainfed                                                                  |
| 11            | Herbaceous cover                                                                   |
| 12            | Tree or shrub cover                                                                |
| 20            | Cropland, irrigated or post flooding                                               |
| 30            | Mosaic cropland (>50%) / natural vegetation (tree, shrub, herbaceous cover) (<50%) |
| 40            | Mosaic natural vegetation (tree, shrub, herbaceous cover) (>50%) / cropland (<50%) |
| 50            | Tree cover, broadleaved, evergreen, closed to open (>15%)                          |
| 60            | Tree cover, broadleaved, deciduous, closed to open (>15%)                          |
| 80            | Tree cover, needleleaved, deciduous, closed to open (>15%)                         |
| 100           | Mosaic tree and shrub (>50%) / herbaceous cover (<50%)                             |
| 110           | Mosaic herbaceous cover (>50%) / tree and shrub (<50%)                             |
| 120           | Shrubland                                                                          |
| 130           | Grassland                                                                          |
| 150           | Sparse vegetation (tree, shrub, herbaceous cover) (<15%)                           |
| 160           | Tree cover, flooded, fresh or brakish water                                        |
| 170           | Tree cover, flooded, saline water                                                  |
| 180           | Shrub or herbaceous cover, flooded, fresh/saline/brakish water                     |
| 190           | Urban areas                                                                        |
| 200           | Bare areas                                                                         |
| 210           | Water bodies                                                                       |

---

**Table S12:** Landcover reclassification

| Class | Label   | ESA-CII Class         |
|-------|---------|-----------------------|
| 1     | Crops   | 10 & 20               |
| 2     | Mosaic  | 12, 30, 40, 100 & 110 |
| 3     | Trees   | 50, 60 & 80           |
| 4     | Shrubs  | 120                   |
| 5     | Grass   | 11 & 130              |
| 6     | Flooded | 160, 170, & 180       |
| 7     | Urban   | 190                   |
| 8     | Bare    | 150 & 200             |
| 9     | Water   | 210                   |
